# Supplementary material for: The CsHEC1-CsOVATE module contributes to fruit neck length variation via modulating auxin biosynthesis in cucumber
Source: PubMed Central journal article supplement — Proc Natl Acad Sci U S A. 2022 Sep 19;119(39):e2209717119. doi: 10.1073/pnas.2209717119 (PMC9522363; doi:10.1073/pnas.2209717119), 2022-09-19
Supplement: pnas.2209717119.sapp.pdf [file pnas.2209717119.sapp.pdf]

## Supplementary Information for

The CsHEC1-CsOVATE module contributes to fruit neck length variation via modulating auxin biosynthesis in cucumber

Zhongyi Wang<sup>1</sup>, Zhaoyang Zhou<sup>1</sup>, Liming Wang<sup>1</sup>, Shuangshuang Yan<sup>1</sup>, Zhihua Cheng<sup>1</sup>, Xiaofeng Liu<sup>1</sup>, Lijie Han<sup>1</sup>, Guangxin Chen<sup>1</sup>, Shaoyun Wang<sup>1</sup>, Weiyuan Song<sup>1</sup>, Jiakai Chen<sup>1</sup>, Liu Liu<sup>1</sup>, Xiaofei Song<sup>2</sup>, Liying Yan<sup>2</sup>, Jianyu Zhao<sup>1\*</sup>, Xiaolan Zhang<sup>1\*</sup>

\*Corresponding authors:

Xiaolan Zhang: zhxiaolan@cau.edu.cn; Tel: (86)10-62732102

Jianyu Zhao: zhaojianyu@cau.edu.cn; Tel: (86)10-62732702

### This PDF file includes:

SI Materials and Methods

Figures S1 to S13

Tables S1 to S4

SI References

## **Materials and Methods**

### **Plant materials and growth conditions**

Cucumber (*Cucumis sativus* L.) inbred line XTMC (a North China type) and GFC (a South China type) were used for genetic transformation. Cucumber inbred lines (199, 20, 75, 144, 64, XTMC, 63, 67) with different fruit neck length were used for expression analysis. Cucumber seeds were germinated at 28°C in the dark, and then grown in a chamber with 16 h light at 25°C and 8 h darkness at 18°C until the two true-leaf stage. Seedlings were then transferred to the greenhouse in China Agricultural University, Beijing. Water and fertilizer management and pest control were performed using the standard procedures. Cotyledons of cucumber seedlings growing for 7-12 days in growth chamber were selected for protoplast isolation and transformation. *Nicotiana benthamiana* plants were grown in a growth chamber under a long-day condition (16-h-light/8-h-dark) at 24°C.

### **Phylogenetic analysis**

To identify HEC homologous proteins from *Cucurbitaceous* species, *Oryza sativa Japonica Group*, and *Solanum lycopersicum*, the amino acid sequences of *Arabidopsis* HEC1/2/3 were used as queries for BLASTp searches. HEC sequences were aligned by ClustalW in MEGA6.0, and this alignment was used to generate a phylogenetic tree using the Neighbor-joining method with 1000 bootstrap replications (1). Accession numbers of all sequences used for phylogenetic analysis are provided in *SI Appendix*, Table S1.

### **CRISPR/Cas9-mediated mutations in cucumber**

To generate mutations in *CsHEC1*, *CsOVATE* and *CsYUC4* using the CRISPR/Cas9 system, specific target sites were obtained from the website (<http://crispr.hzau.edu.cn/cgi-bin/CRISPR2/CRISPR>), and amplified from pCBC-DT1T2 template using four primers DT1-BsF/DT1-F0 and DT2-R0/DT2-BsR (2, 3). Then, corresponding double guide RNAs were cloned into a CRISPR/Cas9 vector pKSE401G (same as the pHSE401G vector except that plant Hygromycin resistance cassette was replaced by Kanamycin) (4) and transformed into cucumber inbred lines using the optimized cotyledon transformation method as previously described (5). To identify CRISPR/Cas9-mediated mutant genotypes, total DNA was extracted from T1 transgenic plants, and fragments containing the target sites or potential off-target sites

were amplified and sequenced using gene-specific primers. The primer information is listed in *SI Appendix*, Table S4.

### **Phenotypic characterization**

For fruit morphology, fruits at 0 DPP, 10 DPP and 40 DPP were assessed for each transgenic line. At least ten plants and each plant with only one pollinated fruit from similar internode (7 to 10) were used for phenotypical analysis. For fruit neck measurement, the mature cucumber fruits were cut longitudinally, and the distance between the proximal end of seed cavity and the distal end of peduncle was defined as the fruit neck length, which usually has no spines/tubercles on the surface and no placenta inside.

### **Generation of *Pro35S:CsHEC1*, *ProCsHEC1:GUS* and *ProCsHEC1:CsYUC4* transgenic plants**

The full-length coding sequence (CDS) without the termination codon of *CsHEC1* was amplified from cDNA and cloned into pCAMBIA1300-Flag vector to generate the *Pro35S:CsHEC1-Flag* construct (6). A 2184 bp promoter sequence was amplified from cucumber genomic DNA and cloned into PBI121 vector (7) which harbors a GUS gene to generate the *ProCsHEC1:GUS* reporter construct. The CDS of *CsYUC4* was cloned and replaced into the *ProCsHEC1:GUS* vector to construct the *ProCsHEC1:CsYUC4* vector. All the recombinant constructs were delivered into *Agrobacterium tumefaciens* strain EHA105 and then transformed into cucumber inbred lines using the optimized cotyledon transformation method as described above (5). The primer information is listed in *SI Appendix*, Table S4.

### **Subcellular localization**

The full-length CDS without the termination codon of *CsHEC1* or *CsOVATE* was cloned into the pCAMBIA1300-GFP or pCAMBIA1300-mCherry vector (pCAMBIA1300 vector harboring a Super promoter, which consists of three copies of the octopine synthase upstream activating sequence preceded by the mannopine synthase promoter) (8, 9) to generate the *CsHEC1-GFP*, *CsHEC1-mCherry* or *CsOVATE-GFP* construct. Subcellular localization assay was performed in fully flattened young leaves of about six-week-old *Nicotiana benthamiana* as previously described (6). The empty pCAMBIA1300-GFP vector was used as a positive control. The images were taken using a confocal laser-scanning microscope (Olympus FV3000, Japan)

at the excitation/emission wavelength of 488/510nm (GFP) and 561/610nm (mCherry). The primer information is listed in *SI Appendix*, Table S4.

### **RNA extraction and expression analysis**

Total RNA was isolated using the Eastep® Super Total RNA Extraction Kit (Promega, Madison, USA) and reverse transcribed into cDNA with the FastKing gDNA Dispelling RT SuperMix Kit (Tiangen Biotech, Beijing, China) according to the manufacturer's instructions. The RT-qPCR was performed on the CFX384 Real-Time PCR Detection System (Bio-Rad, Hercules, CA, USA) using the TB Green® *Premix Ex Taq*™ II reagent (Takara, Shiga, Japan). Three biological and three technical replicates were performed for each gene. The *CsUBI* (*CsaV3\_5G031430*) was used as an internal control. The primer sequences are listed in *SI Appendix*, Table S4.

For analysis of *CsHEC1* expression pattern, different tissues including roots, stems, leaves, male buds, female buds, female flowers at 3 DBA, female flowers on anthesis and ovary at 3 DBA were harvested for RNA extraction. For determination of *CsHEC1*, *CsYUC4* and *CsOVATE* expression levels in different transgenic lines, the proximal part containing the fruit neck of ovaries at 3 days before anthesis was collected for gene expression analysis. The fruit necks of ovaries at anthesis were used for expression analyses of *CsHEC1*, *CsYUC4* and *CsOVATE* in different cucumber germplasms.

For GUS histochemical assay, tissues from *ProCsHEC1:GUS* transgenic plants were vacuumed in the X-Gluc solution (Obiolab, Beijing, China) for 15 min and then incubated at 37 °C for GUS staining. Images was taken using a stereomicroscope (Leica S8 APO, Germany).

### **RNA *in situ* hybridization**

The cucumber shoot apexes of 10-, 17-, 21-day-old seedlings, male flower buds and female flower buds were fixed in 3.7% formal-acetic-alcohol solution and *in situ* hybridization was performed as previously described (10, 11). The *CsHEC1*, *CsHEC2* and *CsOVATE* probes were designed according to their specific region of the corresponding CDS, and sense and antisense probes were synthesized by PCR amplification and *in vitro* transcription were performed using DIG RNA Labeling Kit with SP6 and T7 polymerases (Roche, Basel,

Switzerland) following the description of manufacturer's instructions. The primer sequences are listed in *SI Appendix*, Table S4.

### **Yeast one-hybrid assay**

Two antiparallel oligonucleotides of each CsHEC1-binding site from *CsYUC4* promoter (-1199, -889) with three repeats separated by a 7-bp flanking sequence were designed and synthesized, and then inserted into the pAbAi vector (used as the reporter plasmid). The linearized pAbAi vectors containing the binding sites were transformed into the yeast Y1H Gold strain following the Matchmaker<sup>®</sup> Gold Yeast One-Hybrid Library Screening System manufacturer's manual (Clontech, CA, USA). Positive colonies were screened with optimal Aureobasidin A (AbA) concentration on SD/-Ura (Synthetic Dropout Medium/-Uracil) medium. The full length *CsHEC1* coding sequence was amplified and inserted into the pGADT7 vector (used as the effector plasmid). The resultant pGADT7-CsHEC1 was then transformed into the yeast strain Y1HGold containing pE-box-AbAi colonies and selected on SD/-Leu (Synthetic Dropout Medium/-Leucine) medium with optimal AbA concentration. The primer sequences are listed in *SI Appendix*, Table S4.

### **Dual-Luciferase reporter (DLR) assay**

For transcriptional activity test, the full-length CDS of *CsHEC1* or *VP16* sequence was cloned into the effector GAL4DB vector to generate the GAL4DB-CsHEC1 or GAL4DB-VP16 (positive control) vectors. The resultant fusion effector plasmids and reporter plasmid (GAL4-LUC) were introduced into *Agrobacterium* strain GV3101 (pSoup19), respectively. After co-injection in *N. benthamiana* leaves, activity was determined as described previously (12, 13).

The *CsYUC4* promoter of 1,365 bp in length was amplified and introduced into pGreen II 0800-LUC vector as the reporter construct. The full-length CDS of *CsHEC1*, *CsOVATE* or *Csovate* mutant version was cloned into pGreen II 62-SK as the effector (14). The reporter and effectors were co-expressed in *N. benthamiana* leaves by *Agrobacterium*-mediated transient expression. The Firefly LUC and REN activities were determined by using the Dual-Luciferase<sup>®</sup> reporter assay reagents (Promega, Madison, USA). The primer sequences were listed in *SI Appendix*, Table S4.

### **ChIP-PCR assay**

The full-length CDS of *CsHEC1* or *CsHEC2* without the termination codon was cloned into the transient expression vector pUC19-35S-FLAG-RBS (15). Cucumber protoplasts were transfected with the indicated plasmids, incubated overnight, and then treated with the final concentration of 1% (v/v) formaldehyde to crosslink protein-DNA complexes and stop the cross-linking by adding the final concentration of 0.125 M glycine. Another approach was to harvest and crosslink tissues from WT or Flag-fusion overexpressed transgenic lines. Subsequently, the CHIP-PCR assay was performed as previous described with minor modifications (16, 17). CHIP reaction was performed using 50  $\mu$ l agarose-conjugated anti-FLAG antibody (Sigma-Aldrich, USA, Catalog No. A2220), and the final precipitated DNA was purified using QIAquick PCR Purification Kit (QIAGEN, Germany) for RT-qPCR analysis. The cucumber *TUBULIN* gene (GenBank: AJ715498) was used as an internal control (18), and three biological replicates and three technical replicates were performed. The primers for CHIP-PCR are listed in *SI Appendix*, Table S4.

#### **Yeast two-hybrid assay**

The full-length CDSs of *CsHEC1* and *CsOVATE* were amplified from cDNA and inserted into the bait vector pGADT7 (Takara Bio USA, Cat. Nos. 630442) and prey vector pGBKT7 (Takara Bio USA, Cat. Nos. 630443), respectively. Positive control (pGADT7-T + pGBKT7-53) from Matchmaker® Gold Yeast Two-Hybrid System (Takara Bio USA, Cat. Nos. 630489) (19, 20). The resulting plasmids were then co-transformed into the yeast strain AH109 following the instructions for the yeast transformation. The yeast transformants were selected on synthetic defined SD/-Trp/-Leu agar medium and protein interactions were detected on selective medium SD/-Trp/-Leu/-His/-Ade with X- $\alpha$ -Gal according to Matchmaker® Gold Yeast Two-Hybrid System User Manual. The primers are provided in *SI Appendix*, Table S4.

#### **Protein purification and pull-down assay**

GST and GST-*CsHEC1* were expressed in *E. coli* strain BL21 (DE3) and purified using BeyoGold™ GST-tag Purification Resin and His-*CsOVATE* was purified using BeyoGold™ His-tag Purification Resin (Beyotime Biotech, Shanghai, China) according to the manufacturer's protocols. The primers for pull-down constructs are listed in *SI Appendix*, Table S4.

For pull-down assay, His-CsOVATE (10 µg) was incubated with GST-CsHEC1 (10 µg) or GST (10 µg) with 25 µl of GST resin in a buffer (50 mM Tris-HCl, 0.2% glycerol, 0.25% Triton X-100, 0.1 M NaCl, and 1 mM PMSF) for 2 h at 4 °C. After incubation, the resin was washed two times with buffer I (50 mM Tris-HCl, pH 7.5, 150 mM NaCl), buffer II (50 mM Tris-HCl, pH 7.5, 200 mM NaCl), and buffer III (50 mM Tris-HCl, pH 7.5, 300 mM NaCl). The bound proteins were eluted and detected by anti-GST and anti-His antibodies immunoblot.

### **Firefly luciferase complementation imaging (LCI) assay**

The full-length CDSs of *CsHEC1*, *CsHEC2*, and *CsOVATE* were cloned into pCAMBIA1300-nLUC or pCAMBIA1300-cLUC vector by In-Fusion cloning and then transformed into *Agrobacterium tumefaciens* strain GV3101, respectively. The *Agrobacterium tumefaciens* containing the indicated plasmids were infiltrated in *N. benthamiana* leaves by *Agrobacterium*-mediated transient expression and incubated for 48 h before the LUC activity imaging and measurement. The abaxial sides of leaves were sprayed with 1 mM D-Luciferin, Potassium Salt (Biovision, CA, USA), and the firefly luciferase imaging were captured using a CCD camera system (1300B, Roper Scientific, USA) and performed as previously described (21). The primers for all constructs are listed in *SI Appendix*, Table S4.

### **Co-IP assay**

The CDS of *CsHEC1* was cloned into pCAMBIA1300-GFP vector, and the CDS of *CsOVATE* was cloned into pCAMBIA1300-FLAG vector. Confirmed vectors were transferred into the *Agrobacterium* strain GV3101 and then co-infiltrated into *N. benthamiana* leaves. After 48h of infiltration, total protein was extracted and immunoprecipitation was carried out, according to the previous procedure (6). The eluted proteins were separated by SDS-PAGE and detected by immunoblot with anti-GFP (TransGen Biotech, China, Catalog No. HT801) and anti-FLAG (Sigma-Aldrich, USA, Catalog No. F3165) antibodies. The primer information is listed in *SI Appendix*, Table S4.

### **Extraction and quantification of endogenous auxin**

To measure the auxin (IAA) levels in WT and transgenic plants, about 0.1 g fresh fruit neck from ovaries at 3 DBA were collected as a biological repeat for IAA extraction, and three biological repeats were performed for each genotype. The extraction, purification and

quantification of endogenous auxin were performed using enzyme-linked immunosorbent assay according to the method described previously (22).

### **Histology observation**

Fruit neck samples from 40 DAA fruits were fixed in a 3.7% (v/v) FAA solution (ethanol: acetic acid: glycerol: 37% formaldehyde: ddH<sub>2</sub>O = 50 mL: 5 mL: 5 mL: 10 mL: 30 mL), overnight. After dehydration, embedding and trimming, the samples were sectioned 6 µm thick in the longitudinal direction for aniline blue staining. The sections were imaged using a light microscope (Olympus D72, Japan), and cell length assessments were made using the ImageJ software. All measurements were made on three fields of each tissue section, and three sections from each line.



**Fig. S1**

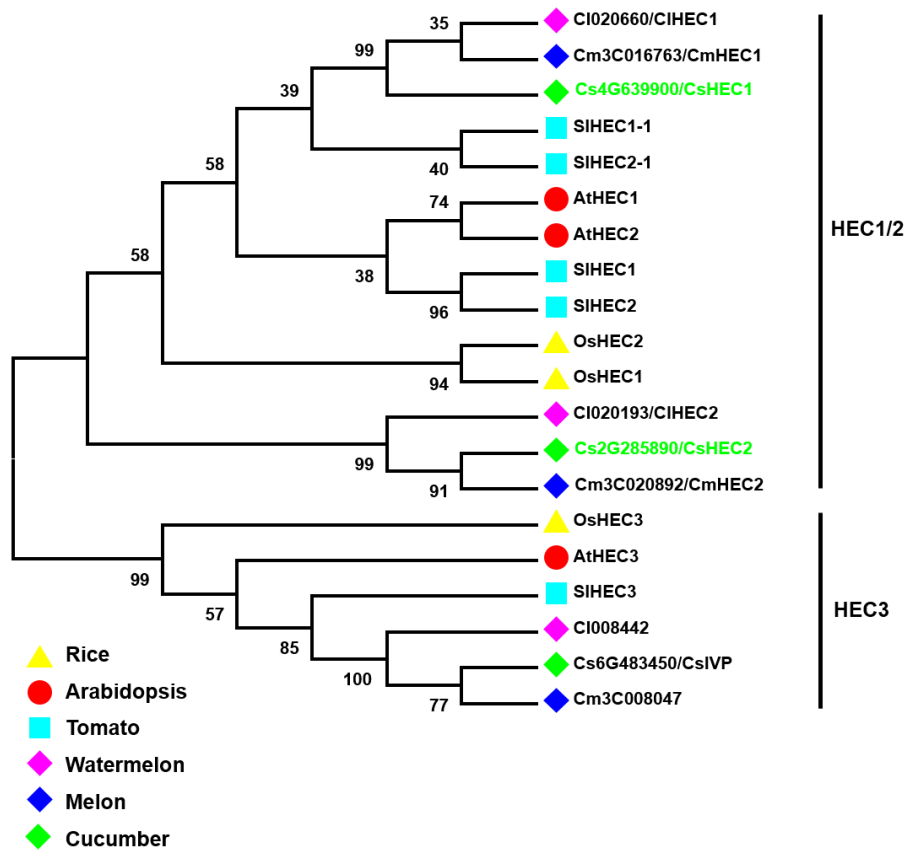

**Fig. S1.** Phylogenetic tree analysis of HEC homologs. The phylogenetic tree was generated using the neighbor-joining method with 1000 bootstrap replications by MEGA 6.0 software.

Fig. S2

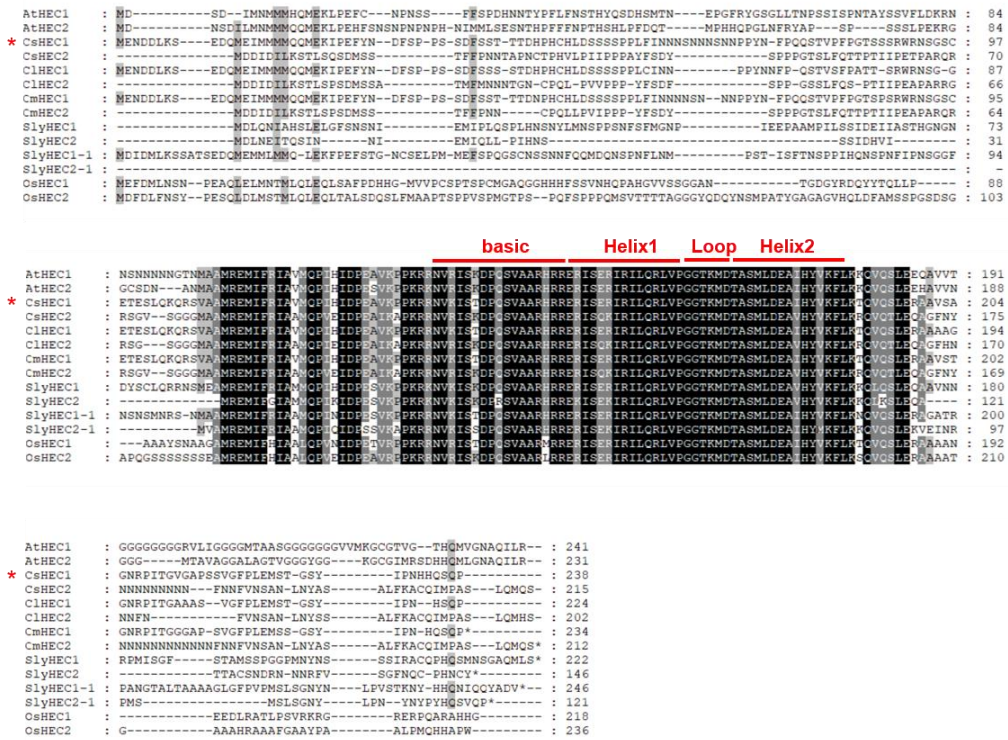

Fig. S2. Protein sequence alignment of HEC1/2 homologs. At, *Arabidopsis thaliana*; Cs, *Cucumis sativus*; Cl, *Citrullus lanatus*; Cm, *Cucumis melo*; Sl, *Solanum lycopersicum*; Os, *Oryza sativa*. The red lines represent the conserved bHLH domain.

Fig. S3

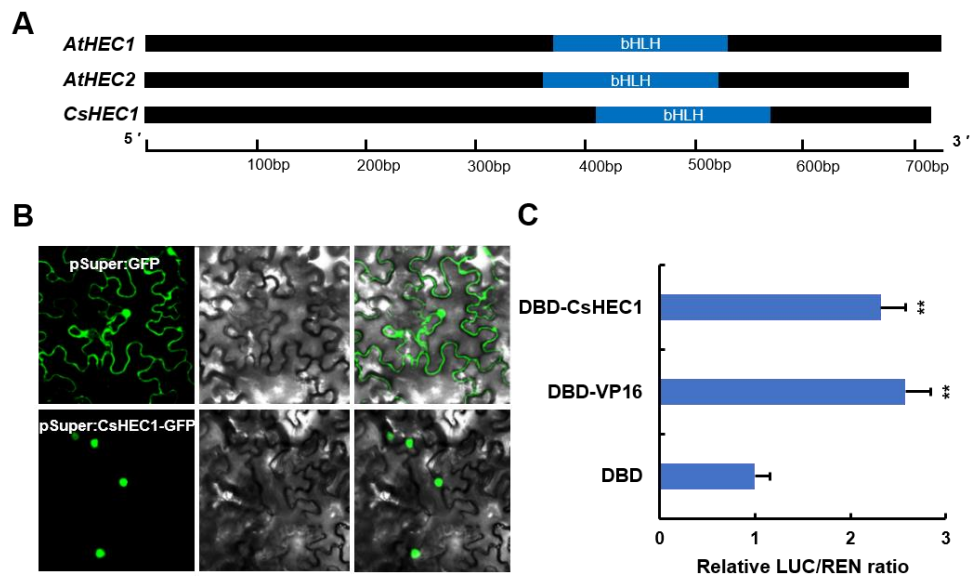

**Fig. S3.** Characterization of the putative transcription factor CsHEC1. (A) Gene structure of CsHEC1. Blue boxes represent the bHLH domain. (B) Subcellular localization of CsHEC1 in *N. benthamiana* leaves. The empty pSuper:GFP vector was used as a control. (C) Transactivation activity analysis of CsHEC1 protein in *N. benthamiana* leaves using a GAL4/UAS-based system. DBD and DBD-VP16 were used as a negative and positive control, respectively. The mean values  $\pm$  SD from six biological replicates. Significance analysis compared to DBD control was performed with the two-tailed Student's *t* test (\*\* $p < 0.01$ ).

Fig. S4

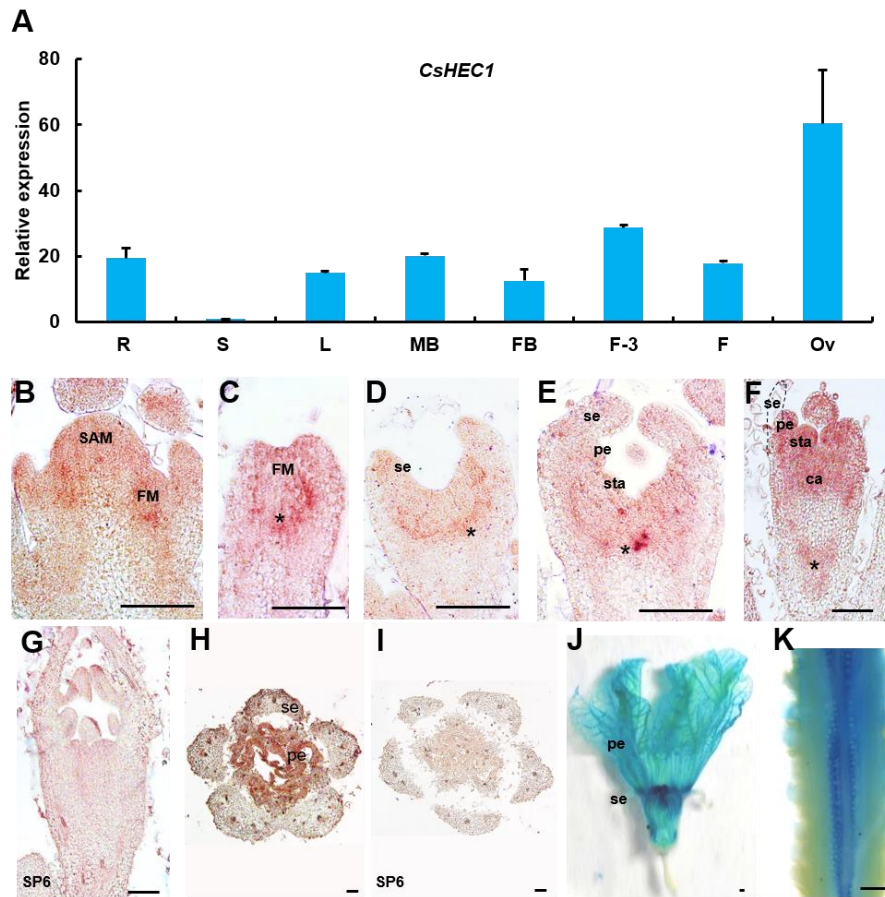

**Fig. S4.** Gene expression analysis of *CsHEC1* in cucumber. (A) The expression pattern of *CsHEC1* in different organs. R, root; S, stems; L, leaves; MB, male buds; FB, female buds; F-3, female flowers at 3 days before anthesis (DBA); F, female flowers at anthesis; Ov, ovary at 3 DBA. *CsHEC1* transcripts were quantified by RT-qPCR using *CsUBI* as the internal standard. Values are means  $\pm$  SD ( $n = 3$ ). (B-I) *In situ* hybridization analysis of *CsHEC1*. *CsHEC1* is expressed in the shoot apical meristem (SAM) and floral meristem (FM) (B). Longitudinal sections of developing flower primordium at stage 1 (C), stage 3 (D), stage 4 (E) and stage 7 (F). Cross sections of the female flower corolla at stage 8 (H, I). The sense *CsHEC1* probe was hybridized as a negative control (G, I). Asterisks indicate the developing fruit neck in (C-F). Scale bar, 100  $\mu$ m. (J and K) *CsHEC1* expression was examined using the *ProCsHEC1::GUS* reporter system. High expression of *CsHEC1* was found in sepal and petal at anthesis (J), as well as in developing ovules in the female flower (K). Scale bar, 1 mm. se, sepal; pe, petal; sta, stamen; ca, carpel.

Fig. S5

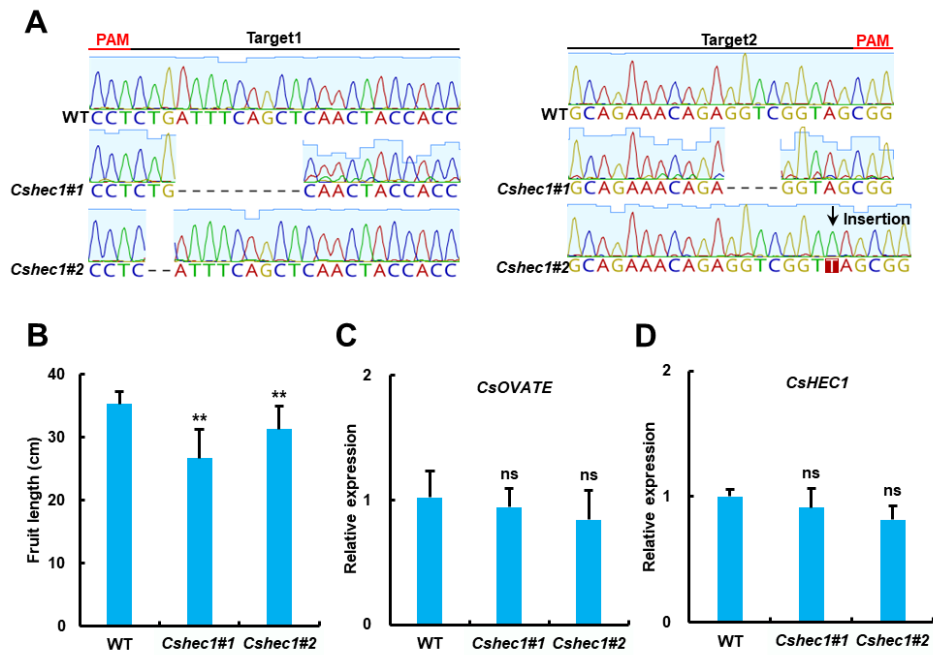

**Fig. S5.** Genotyping and quantitative analysis of *Cshec1* mutants. (A) Sequencing chromatogram analysis of edited sites in *Cshec1* mutants. Black underlines indicate targeted sequences and red underlines represent the protospacer-adjacent motif (PAM) sequences. Nucleotide deletions are indicated by dashes and nucleotide insertion by arrow. (B) Quantitative analysis of fruit lengths from fruits at 40 DPP. (C and D) Expression analysis of *CsOVATE* (C) and *CsHEC1* (D) in *Cshec1* mutants. Values are means  $\pm$  SD (Student's *t* test, two-tailed; \*\* $P < 0.01$ ; ns, no significant difference).

Fig. S6

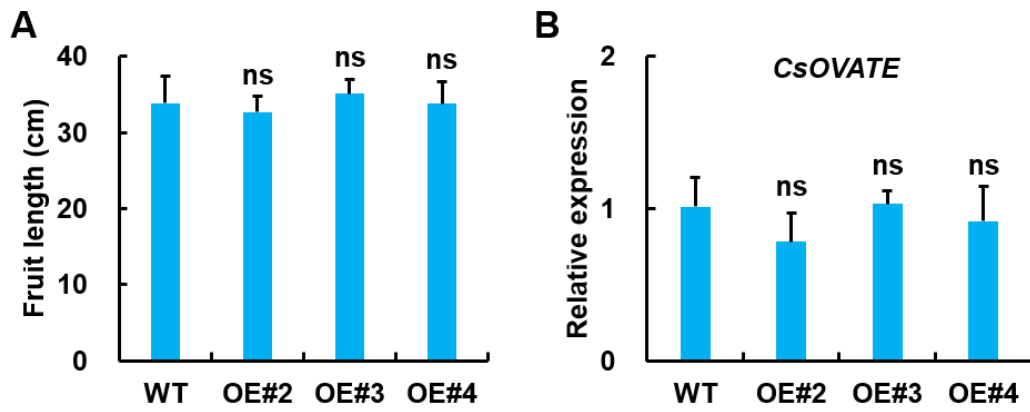

**Fig. S6.** Quantitative analysis of *CsHEC1*-OE lines. (A) Quantitative analysis of fruit lengths from fruits at 40 DPP. (B) Expression analysis of *CsOVATE* in *CsHEC1*-OE lines. Values are means  $\pm$  SD ( $n = 6$ ) Significance analysis compared to WT was performed with the two-tailed Student's *t* test (ns, no significant difference).

Fig. S7

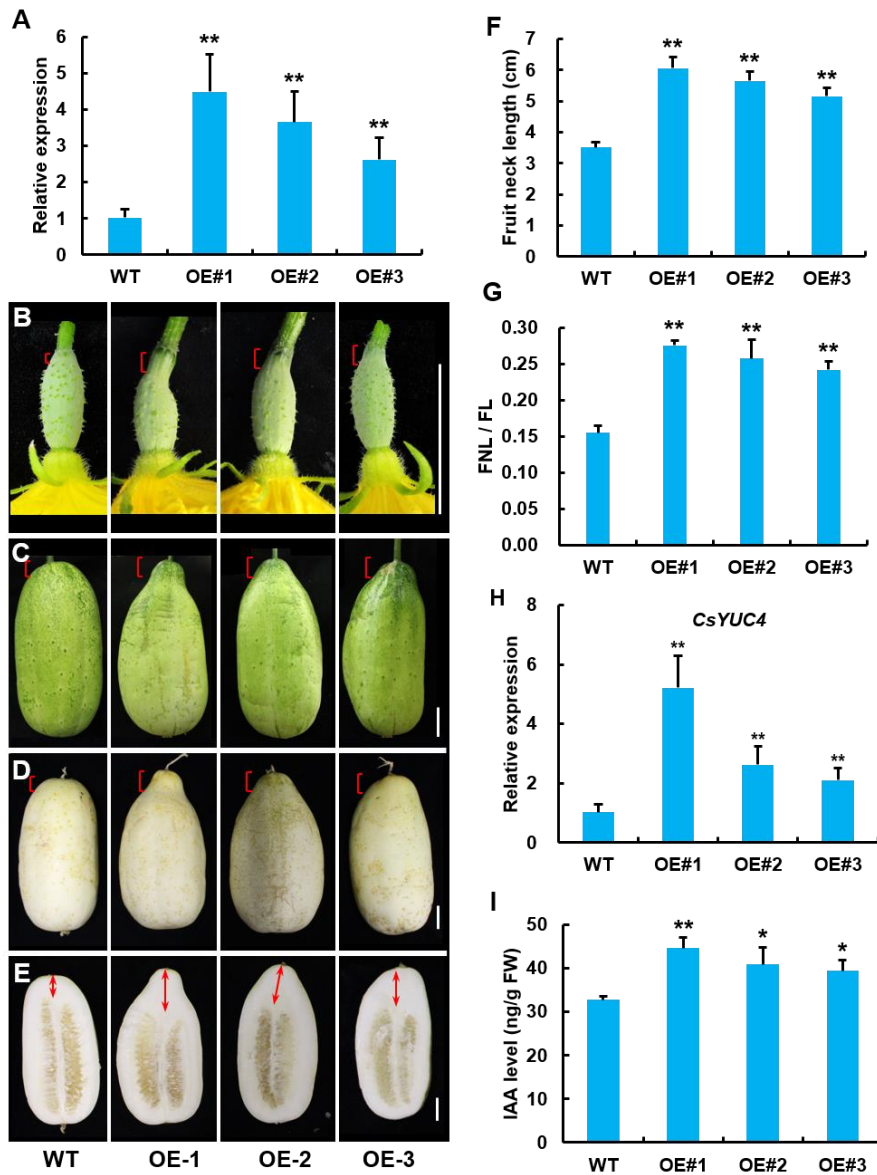

**Fig. S7.** Overexpression of *CsHEC1* resulted in elongated fruit neck and increased auxin content in South China type cucumber GFC. (A) *CsHEC1* expression in the WT (GFC) and three overexpression transgenic lines. (B-E) Fruit phenotype at 0 DPP (B), 15 DPP (C) and 40 DPP (D, E) in 35S:*CsHEC1* transgenic plants. The red brackets indicate the fruit neck and the double arrows represent the measured length of fruit neck. Scale bars, 3 cm. (F and G) Quantification of fruit neck length (F) and ratio of FNL/FL (G) in WT and *CsHEC1*-OE fruits at 40 DPP. (H) *CsYUC4* expression analysis. (I) IAA content in the fruit necks. Values are means  $\pm$  SD ( $n = 5$  in F and G;  $n = 3$  H and I) (\*\* $P < 0.01$ ; \* $P < 0.05$ ; Student's *t* test, two-tailed).

Fig. S8

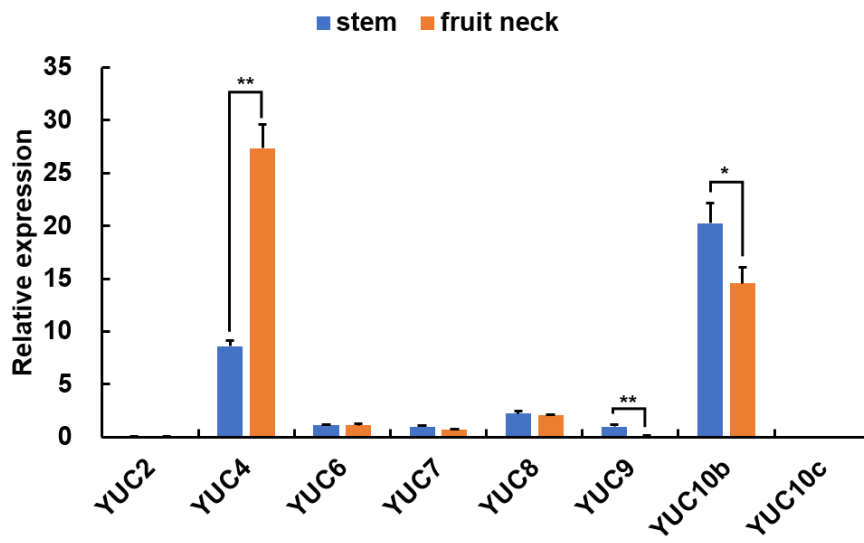

**Fig. S8.** Gene expression analysis of CsYUCs in young stems and fruit necks at 3 DBA. Values are means  $\pm$  SD of 3 independent biological replicates. Asterisks indicate significant differences according to a Student's *t* test (two-tailed, \* $P < 0.05$ , \*\* $P < 0.01$ ).



Fig. S9

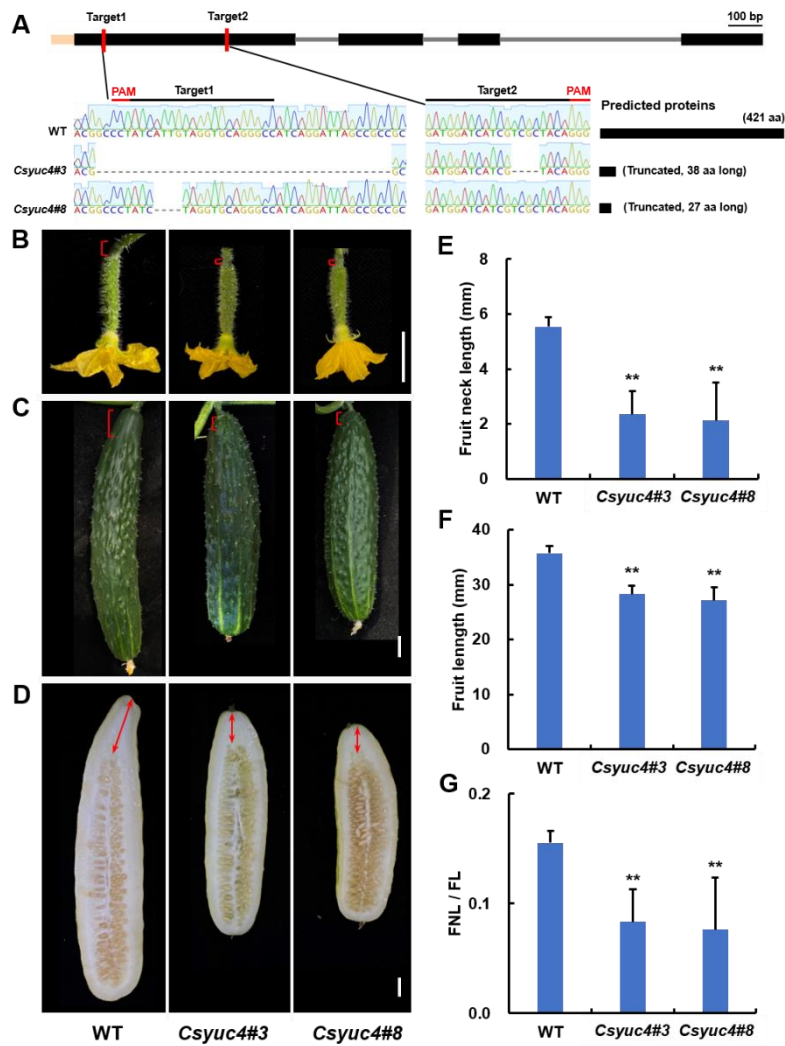

**Fig. S9.** Knockout of *CsYUC4* resulted in reduced fruit neck length in cucumber. (A) Genotype identification of *Csyuc4* knockout lines indicated the *Csyuc4#3* allele with 41-bp and 4-bp deletions and the *Csyuc4#8* allele with a 4-bp deletion, both generating a premature stop codon and resulting in truncated proteins of 33 amino acids and 27 amino acids in length, respectively. (B-D) Fruit morphology of WT and *Csyuc4* mutants at 0 DPP (B), 10 DPP (C) and 40 DPP (D). The brackets indicated the fruit necks and the double arrows represent the measured fruit neck length. Scale bars, 2 cm. (E-G) Quantification of fruit neck length (E), fruit length (F) and ratio of FNL/FL (G) in WT and *Csyuc4* mutants at anthesis. Values are means  $\pm$  SD ( $n = 7$ ). Significance analysis compared to WT was performed with the two-tailed Student's *t* test (\*\* $P < 0.01$ ).

Fig. S10

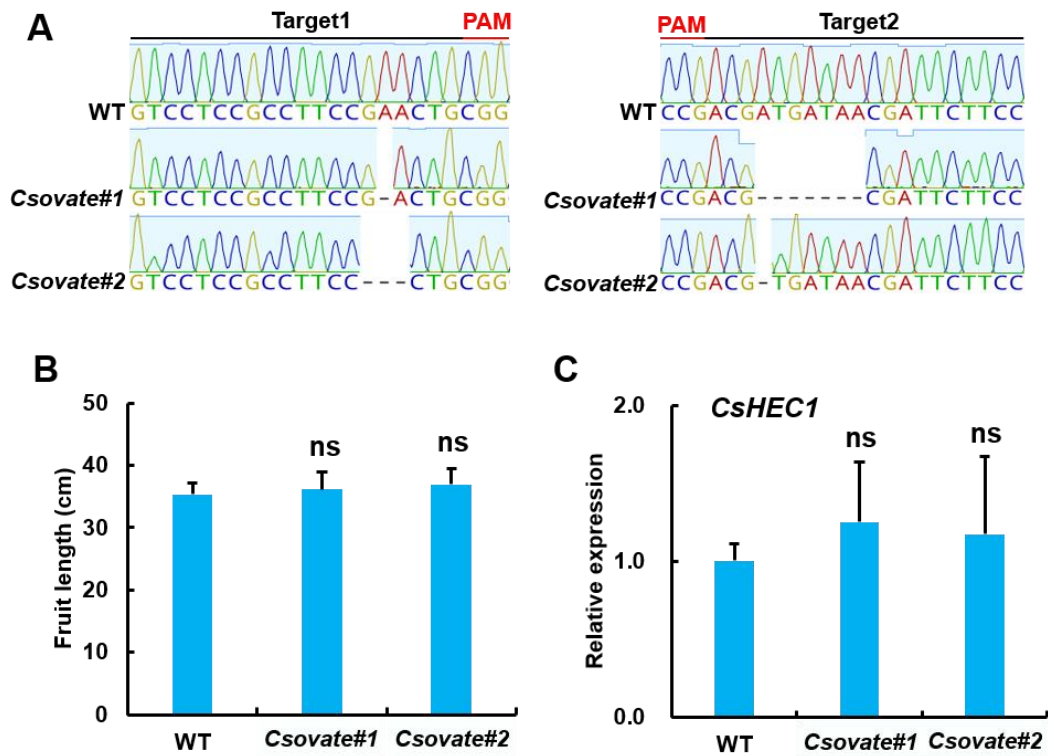

**Fig. S10.** Genotyping and quantitative analysis of *Csovate* mutants. (A) Sequencing chromatogram analysis of edited sites in *Csovate* mutants. Black underlines indicate targeted sequences and red underlines represent the PAM sequences. Nucleotide deletions are indicated by dashes. (B) Quantitative analysis of fruit lengths from fruits at 40 DPP. (C) Expression analysis of *CsHEC1* in *Csovate* mutants. Values are means  $\pm$  SD (Student's *t* test, two-tailed; ns, no significant difference).

Fig. S11

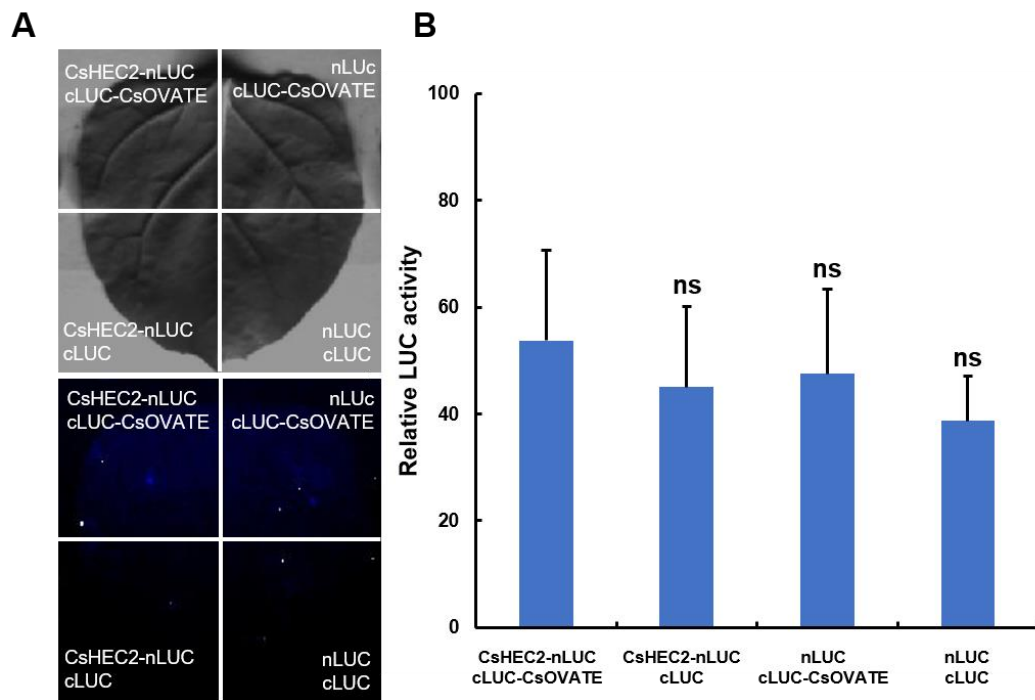

**Fig. S11.** CsHEC2 did not interact with CsOVATE in *N. benthamiana* leaves. The firefly luciferase complementation imaging assay was performed with the indicated constructs in the left panel (A), and relative luciferase activity was shown in the right panel (B). cLUC, C-terminal LUC; nLUC, N-terminal LUC. The mean values  $\pm$  SD from six biological replicates (Student's *t* test, two-tailed, ns, no significant difference).

Fig. S12

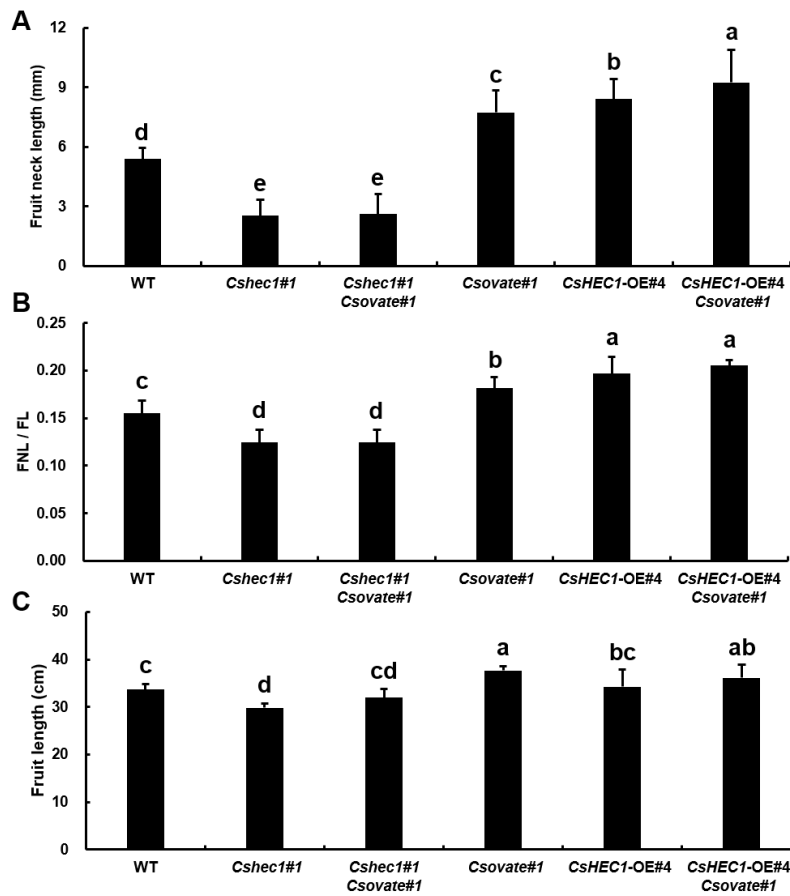

**Fig. S12.** Quantification of fruit neck length (A) at anthesis, ratio of FNL/FL (B) and fruit length (C) at maturity in the indicated lines. Values are means  $\pm$  SD ( $n = 15$  in A;  $n = 7$  in B and C). The different lowercase letters indicate significant differences ( $P < 0.05$ ) by one-way ANOVA analysis with Duncan's test.

**Fig. S13**

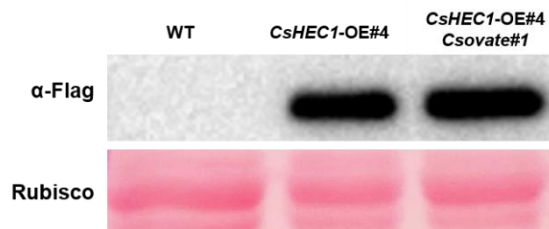

**Fig. S13.** Immunoblot analysis of *CsHEC1* protein levels in *CsHEC1*-OE#4 and *CsHEC1*-OE#4/*Csovate*#1 lines using anti-Flag antibody. Rubisco large subunit stained by Ponceau S was served as a loading control.

**Table S1. Gene information used in this study.**

| <b>Gene name</b> | <b>Species</b>                     | <b>Family</b> | <b>Accession</b>   |
|------------------|------------------------------------|---------------|--------------------|
| <i>AtHEC1</i>    | <i>Arabidopsis thaliana</i>        | Brassicaceae  | AT5G67060.1        |
| <i>AtHEC2</i>    | <i>Arabidopsis thaliana</i>        | Brassicaceae  | AT3G50330.1        |
| <i>AtHEC3</i>    | <i>Arabidopsis thaliana</i>        | Brassicaceae  | AT5G09750.1        |
| <i>CsHEC1</i>    | <i>Cucumis sativus</i>             | Cucurbitaceae | Csa4G639900        |
| <i>CsHEC2</i>    | <i>Cucumis sativus</i>             | Cucurbitaceae | Csa2G285890        |
| <i>CsIVP</i>     | <i>Cucumis sativus</i>             | Cucurbitaceae | Csa6G483450        |
| <i>CIHEC1</i>    | <i>Citrullus lanatus</i>           | Cucurbitaceae | Cla020660          |
| <i>CIHEC2</i>    | <i>Citrullus lanatus</i>           | Cucurbitaceae | Cla020193          |
| <i>CIHEC3</i>    | <i>Citrullus lanatus</i>           | Cucurbitaceae | Cla008442          |
| <i>CmHEC1</i>    | <i>Cucumis melo</i>                | Cucurbitaceae | MELO3C016763       |
| <i>CmHEC2</i>    | <i>Cucumis melo</i>                | Cucurbitaceae | MELO3C020892       |
| <i>CmHEC3</i>    | <i>Cucumis melo</i>                | Cucurbitaceae | MELO3C008047       |
| <i>OsHEC1</i>    | <i>Oryza sativa</i> Japonica Group | Poaceae       | XP_015649315.1     |
| <i>OsHEC2</i>    | <i>Oryza sativa</i> Japonica Group | Poaceae       | XP_015610996.1     |
| <i>OsHEC3</i>    | <i>Oryza sativa</i> Japonica Group | Poaceae       | XP_015649611.1     |
| <i>SIHEC1</i>    | <i>Solanum lycopersicum</i>        | Solanaceae    | Solyc02g090950.1.1 |
| <i>SIHEC1-1</i>  | <i>Solanum lycopersicum</i>        | Solanaceae    | Solyc04g078790.2.1 |
| <i>SIHEC2</i>    | <i>Solanum lycopersicum</i>        | Solanaceae    | Solyc03g044460.1.1 |
| <i>SIHEC2-1</i>  | <i>Solanum lycopersicum</i>        | Solanaceae    | Solyc12g088790.1.1 |
| <i>SIHEC3</i>    | <i>Solanum lycopersicum</i>        | Solanaceae    | Solyc11g005780.1.1 |
| <i>CsOVATE</i>   | <i>Cucumis sativus</i>             | Cucurbitaceae | Csa4G038760        |
| <i>CsYUC4</i>    | <i>Cucumis sativus</i>             | Cucurbitaceae | Csa2G379350        |
| <i>CsYUC2</i>    | <i>Cucumis sativus</i>             | Cucurbitaceae | Csa1G242600        |
| <i>CsYUC6</i>    | <i>Cucumis sativus</i>             | Cucurbitaceae | Csa2G375750        |
| <i>CsYUC7</i>    | <i>Cucumis sativus</i>             | Cucurbitaceae | Csa3G133910        |
| <i>CsYUC8</i>    | <i>Cucumis sativus</i>             | Cucurbitaceae | Csa6G087870        |
| <i>CsYUC9</i>    | <i>Cucumis sativus</i>             | Cucurbitaceae | Csa3G619930        |
| <i>CsYUC10a</i>  | <i>Cucumis sativus</i>             | Cucurbitaceae | Csa2G302220        |
| <i>CsYUC10b</i>  | <i>Cucumis sativus</i>             | Cucurbitaceae | Csa3G190380        |
| <i>CsYUC10c</i>  | <i>Cucumis sativus</i>             | Cucurbitaceae | Csa7G390100        |
| <i>CsYUC11</i>   | <i>Cucumis sativus</i>             | Cucurbitaceae | Csa6G396640        |

**Table S2. Analysis of the potential off-target sites for *CsHEC1* sgRNA.**

| Targets | Potential off-target sites |                                 |                         |                      | Number of plants examined | Number of plants mutated |
|---------|----------------------------|---------------------------------|-------------------------|----------------------|---------------------------|--------------------------|
|         | Name                       | Sequence                        | Locus                   | Number of mismatches |                           |                          |
| Target1 | T1-off1                    | GAGTGTGAGCAGAAATCAG <b>CGG</b>  | scaffold01658: +330210  | 4                    | 6                         | 0                        |
|         | T1-off2                    | GATAGTTTACTGAAATCAT <b>CGG</b>  | scaffold00919: -1650832 | 4                    | 6                         | 0                        |
|         | T1-off3                    | GGCAGTGGAGTTGAAATCAG <b>TAG</b> | scaffold02219: +622668  | 3                    | 6                         | 0                        |
|         | T1-off4                    | GGCAGTTGAGGAGAAA <b>CAGAAG</b>  | scaffold00542: -958406  | 4                    | 6                         | 0                        |
| Target2 | T2-off1                    | CCATAAAGAGAGGTCGGTAG <b>AGG</b> | scaffold01256: +37721   | 3                    | 6                         | 0                        |
|         | T2-off2                    | GCAGAAACTGAGATAGATAG <b>AGG</b> | scaffold01416: -652177  | 4                    | 6                         | 0                        |
|         | T2-off3                    | CCAGAAACAAGGTCGAT <b>GCAG</b>   | scaffold02951: -891739  | 4                    | 6                         | 0                        |
|         | T2-off4                    | GCAGAAAAGAGGACAGTAC <b>CAG</b>  | scaffold00493: -111727  | 4                    | 6                         | 0                        |
|         | T2-off5                    | GCAGAACCA <b>CAGGTCGGCGGCGG</b> | scaffold03356: -2313772 | 4                    | 6                         | 0                        |

Note: PAM sequences or potential PAM sequences are written in bold; Mismatch bases are written in red letters.

**Table S3. Analysis of the potential off-target sites for CsOVATE sgRNA.**

| Targets | Potential off-target sites |                                                                    |                         |                      | Number of plants examined | Number of plants mutated |
|---------|----------------------------|--------------------------------------------------------------------|-------------------------|----------------------|---------------------------|--------------------------|
|         | Name                       | Sequence                                                           | Locus                   | Number of mismatches |                           |                          |
| Target1 | T1-off1                    | <b>TTTCTCAT</b> CCTTCCGAACTGCAG                                    | scaffold01933: -88576   | 4                    | 6                         | 0                        |
|         | T1-off2                    | CTCCTCCG <b>AG</b> TTCCGAGCTG <b>AGG</b>                           | scaffold01079: +444457  | 4                    | 6                         | 0                        |
| Target2 | T2-off1                    | GTAAGAA <b>ACT</b> TTATCATCT <b>T</b> CAG                          | scaffold04100: +1247758 | 4                    | 6                         | 0                        |
|         | T2-off2                    | GGAAGAAT <b>T</b> GTT <b>CC</b> CATCT <b>T</b> TGG                 | scaffold01037: +1250068 | 4                    | 6                         | 0                        |
|         | T2-off3                    | GGAAGAA <b>GG</b> GTT <b>T</b> CG <b>T</b> CG <b>T</b> CG <b>G</b> | scaffold03746: +143195  | 4                    | 6                         | 0                        |
|         | T2-off4                    | GGAAGAATCGTT <b>G</b> T <b>G</b> AT <b>G</b> GTT <b>G</b>          | scaffold01989: -5216    | 3                    | 6                         | 0                        |

Note: PAM sequences or potential PAM sequences are written in bold; Mismatch bases are written in red letters.



**Table S4. Primers used in this study**

| <b>Primers for gene amplification and vector construction</b> |                                                |
|---------------------------------------------------------------|------------------------------------------------|
| <i>CsHEC1-clone-F</i>                                         | ATGGAAAATGATGATTTAAAATCGG                      |
| <i>CsHEC1-clone-R</i>                                         | TCAAGGTTGGGATTGATGATGAT                        |
| <i>CsHEC2-clone-F</i>                                         | ATGGACGATATCGACATCCTCA                         |
| <i>CsHEC2-clone-R</i>                                         | TCAAGACTGCATTTGCAAAGAA                         |
| <i>CsOVATE-clone-F</i>                                        | ATGATGATGACACCAAACG                            |
| <i>CsOVATE-clone-R</i>                                        | TCAGTTACAGAACAGAGACTG                          |
| <i>CsHEC1-OE-F</i>                                            | GCTCTAGAATGGAAAATGATGATTTAAAATCGG              |
| <i>CsHEC1-OE-R</i>                                            | TCCCCCGGGTCAAGGTTGGGATTGATGATGAT               |
| <i>ProCsHEC1-clone-F</i>                                      | AACGGTGACGTATTTGGATCAAAATCC                    |
| <i>ProCsHEC1-clone-R</i>                                      | AGGATTAAGAAAAAAGAATCTCCGACCTGATC               |
| <i>CsYUC4-clone-F</i>                                         | ATGGCTTCTTGCAAAGACCA                           |
| <i>CsYUC4-clone-R</i>                                         | TCATTTTCGTATGGATTCTTTAAGGACT                   |
| <i>CsYUC4-OE-F</i>                                            | GAGAACACGGGGGACTCTAGAGGATCCATGGCTTCTTGCAAAGACC |
| <i>CsYUC4-OE-R</i>                                            | CGATCGGGGAAATTCGAGCTCTCATTTTCGTATGGATTCTTTAAGG |
| <i>D35SGFP-Terminal-F</i>                                     | ATTTGGGTGATGGTTCACGTAGTGAAGAACATCGATTTTCCATGGC |
| <i>D35SGFP-Terminal-R</i>                                     | TCAGGGCGATGGCCACTACGTGTGTTTGACAGCTTATCATCGG    |
| <i>CsHEC1-GFP-F</i>                                           | TACACCAAATCGACTCTAGAATGGAAAATGATGATTTAAAATCGG  |
| <i>CsHEC1-GFP-R</i>                                           | TGGTGATGGTCGACCCCGGGAGGTTGGGATTGATGATGAT       |
| <i>CsHEC1-mCherry-F</i>                                       | TACACCAAATCGACTCTAGAATGGAAAATGATGATTTAAAATCGG  |
| <i>CsHEC1-mCherry-R</i>                                       | CTGGTACCGGATCCACTAGTAGGTTGGGATTGATGATGAT       |
| <i>CsOVATE-GFP-F</i>                                          | CACCAAATCGACTCTAGAATGATGATGACACCAAACG          |
| <i>CsOVATE-GFP-R</i>                                          | GTGATGGTCGACCCCGGGTTACAGAACAGAGACTGCC          |
| <i>CsHEC1-DT1-BsF</i>                                         | ATATATGGTCTCGATTGCAGAAACAGAGGTCGGTAGGTT        |
| <i>CsHEC1-DT1-F0</i>                                          | TGCAGAAACAGAGGTCGGTAGGTTTTAGAGCTAGAAATAGC      |
| <i>CsHEC1-DT2-R0</i>                                          | AACCTGATTTAGCTCAACTACCAATCTCTTAGTCGACTCTAC     |
| <i>CsHEC1-DT2-BsR</i>                                         | ATTATTGGTCTCGAAACCTGATTTAGCTCAACTACCAA         |
| <i>CsOVATE-DT1-BsF</i>                                        | ATATATGGTCTCGATTGCCTCCGCCTTCCGAACTGGTT         |
| <i>CsOVATE-DT1-F0</i>                                         | TGTCCTCCGCCTTCCGAACTGGTTTTAGAGCTAGAAATAGC      |
| <i>CsOVATE-DT2-R0</i>                                         | AACACGATGATAACGATTCTTCCAATCTCTTAGTCGACTCTAC    |
| <i>CsOVATE-DT2-BsR</i>                                        | ATTATTGGTCTCGAAACACGATGATAACGATTCTTCCAA        |
| <i>CsYUC4-DT1-BsF</i>                                         | ATATATGGTCTCGATTGGCCCTGCACCTACAATGATGTT        |
| <i>CsYUC4-DT1-F0</i>                                          | TGGCCCTGCACCTACAATGATTTTTAGAGCTAGAAATAGC       |
| <i>CsYUC4-DT2-R0</i>                                          | AACTGTAGCGACGATGATCCATCAATCTCTTAGTCGACTCTAC    |
| <i>CsYUC4-DT2-BsR</i>                                         | ATTATTGGTCTCGAAACTGTAGCGACGATGATCCATCAA        |
| <b>Primers for qRT-PCR</b>                                    |                                                |
| <i>CsHEC1-Q-F</i>                                             | TGATTCTCTTCATCGCCTC                            |
| <i>CsHEC1-Q-R</i>                                             | GCTTCACCGCTTCTGGGTCTAT                         |
| <i>CsHEC2-Q-F</i>                                             | CGGGAAAGGATTAGCCAGAAA                          |
| <i>CsHEC2-Q-R</i>                                             | CTTGAAAAGGGCAGAAGCGTA                          |
| <i>CsYUC4-Q-F</i>                                             | GGTATAGAAGCAATGTGCCAAG                         |

|              |                            |
|--------------|----------------------------|
| CsYUC4-Q-R   | AATGCTTGCCATCTTTATTCCC     |
| CsYUC2-Q-F   | TGCAAGGCAAAAGACTTCACG      |
| CsYUC2-Q-R   | GCTATACATTCCGGCTCTTTCAAGGA |
| CsYUC6-Q-F   | GAAGTATTTGGAGGATTACGCTG    |
| CsYUC6-Q-R   | TGTTTCCTCAGAACGACCGC       |
| CsYUC7-Q-F   | GGTGAGGCTTACCGTGGGAAAC     |
| CsYUC7-Q-R   | CTTGGCATCATGGTTACAAAGA     |
| CsYUC8-Q-F   | GGGCTATCTGGGGCTTCATC       |
| CsYUC8-Q-R   | AGCGTCTATGGCAAGCAGTT       |
| CsYUC9-Q-F   | CCGAGTCTTCCGTTTCTGGT       |
| CsYUC9-Q-R   | GGCATGACACACTCTGCATTTTC    |
| CsYUC10a-Q-F | GTCCTTCTGGCTTGGCTACCT      |
| CsYUC10a-Q-R | TGGCTAAGTGAAGGCATAAACG     |
| CsYUC10b-Q-F | CCTTCTGGTCTTGCCACTGC       |
| CsYUC10b-Q-R | CAAACCGATTGGGGAGG          |
| CsYUC10c-Q-F | CTATCCACCGCCGCATGTTTA      |
| CsYUC10c-Q-R | CGCCAGCTCCGATGATTTCTT      |
| CsYUC11-Q-F  | CAATGCACCGACGTATATTTCG     |
| CsYUC11-Q-R  | CCTCTCTTGCTCACCCTACTTGT    |
| CsUBI-Q-F    | CACCAAGCCCAAGAAGATC        |
| CsUBI-Q-R    | TAAACCTAATCACCACCAGC       |

---

**Primers for *in situ* probes**

---

|              |                                                  |
|--------------|--------------------------------------------------|
| CsHEC1-SP6   | GATTTAGGTGACACTATAGAATGCTATGGAAAATGATGATTTAAA    |
| CsHEC1-T7    | TGTAATACGACTCACTATAGGGTCAAGGTTGGGATTGATGATG      |
| CsOVATE-SP6  | GATTTAGGTGACACTATAGAATGCTATGATGATGACACCAAAAACG   |
| CsOVATE-T7   | TGTAATACGACTCACTATAGGGGAGATGATCGTTGTCCTCT        |
| CsHEC1-SP6-2 | GATTTAGGTGACACTATAGAATGCTATTCTTAAAAACCAAGTTTCAGT |
| CsHEC1-T7-2  | TGTAATACGACTCACTATAGGGTCAAGGTTGGGATTGATGA        |
| CsHEC2-SP6   | GATTTAGGTGACACTATAGAATGCTATGGACGATATCGACATCCT    |
| CsHEC2-T7    | TGTAATACGACTCACTATAGGGTCAAGACTGCATTTGCAAAG       |

---

**Primers for potential off-target sites analysis**

---

|               |                        |
|---------------|------------------------|
| HEC1-T1-off1F | CAATTGTCAATGTGAAGTTCCG |
| HEC1-T1-off1R | CTCCGACAACCTTGCAAGA    |
| HEC1-T1-off2F | GGAGCCATTATAGCCTTCAC   |
| HEC1-T1-off2R | CTAAGTTGAGCATTATTGTGC  |
| HEC1-T1-off3F | AACGGAAATCTGTTGTGCT    |
| HEC1-T1-off3R | AAGGGATTTAACCAGATTCTGT |
| HEC1-T1-off4F | GTGAATGAAATGACACTTGTG  |
| HEC1-T1-off4R | TCCCAGTAGTATTGCCAGAG   |
| HEC1-T1-off1F | GTTGAGATGAACTGTGAAGG   |
| HEC1-T2-off1R | ACCTTCCTTCAAACCCCTTC   |
| HEC1-T2-off2F | TCGATAATCCACTCGATCTC   |
| HEC1-T2-off2R | TCAGGTGGAGATATACTTCC   |
| HEC1-T2-off3F | CTCACCGTGCAAGATTTGT    |

---

---

|                         |                         |
|-------------------------|-------------------------|
| <i>HEC1-T2-off3R</i>    | ATCAGATGAGGTTGGAAGC     |
| <i>HEC1-T2-off4F</i>    | GAGATTGAACATATACGTGACG  |
| <i>HEC1-T2-off4R</i>    | AGAAATGCAAGTGATGATTC    |
| <i>HEC1-T2-off5F</i>    | CACAATCGAGAATCACCAATC   |
| <i>HEC1-T2-off5R</i>    | TCAACCAATAGTTTGGGTCA    |
| <i>OVATE-T1-off1F</i>   | CTGTTGAAACAGTGACCAAC    |
| <i>OVATE -T1-off1R</i>  | CTCAATTCAGTGTACTGATGAG  |
| <i>OVATE-T1- off2F</i>  | GCAGTAGCTCAATCTGAATC    |
| <i>OVATE -T1- off2R</i> | CCATAACCGATATAGAGTATGTG |
| <i>OVATE-T2-off1F</i>   | CAGATACCAAATCTACAGTTGG  |
| <i>OVATE-T2-off1R</i>   | GAATCATGTGCCAATCTAAGC   |
| <i>OVATE-T2-off2F</i>   | ATGAGAGGGATATGTGCAAG    |
| <i>OVATE-T2-off2R</i>   | CATAGTGGACGGTAATATCTTC  |
| <i>OVATE-T2-off3F</i>   | GGTTCTGGGTCAATGACA      |
| <i>OVATE-T2-off3R</i>   | GAGTTATGCTCGTTAGGACA    |
| <i>OVATE-T2-off4F</i>   | TCAACACACGCAATTAGT      |
| <i>OVATE-T2-off4R</i>   | CATCGTTAGAGTCATTGATATG  |

---

**Primers for yeast two-hybrid, Split-LUC, pull-down and Co-IP assay**

---

|                          |                                          |
|--------------------------|------------------------------------------|
| <i>AtHAN-YTH-F</i>       | GGAATTCCATATGATGATGCAGACTCCGTACT         |
| <i>AtHAN -YTH-R</i>      | CGGGATCCCTCTGGTAAAGTCATGGACAAGAC         |
| <i>CsHEC1-YTH-F</i>      | GGGAATTCCATATGATGGAAAATGATGATTTAAAATCGG  |
| <i>CsHEC1-YTH-R</i>      | CGCGGATCCTCAAGGTTGGGATTGATGATGAT         |
| <i>CsHEC2-YTH-F</i>      | GGGAATTCCATATGATGGACGATATCGACATCCTCAA    |
| <i>CsHEC2-YTH-R</i>      | CGCGGATCCTCAAGACTGCATTTGCAAAGAAGC        |
| <i>CsOVATE-YTH-F</i>     | GATTACGCTCATATGATGATGATGACACCAAACG       |
| <i>CsOVATE-YTH-R</i>     | GAGCTCGATGGATCCTCAGTTACAGAACAGAGACTG     |
| <i>CsHEC1-nLuc-F</i>     | GACGAGCTCGGTACCATGGAAAATGATGATTTAAAATCGG |
| <i>CsHEC1-nLuc-R</i>     | CGAGATCTGGTCGACAGGTTGGGATTGATGATGATTAG   |
| <i>CsHEC1-cLuc-F</i>     | TCCCGGGCGGTACCATGGAAAATGATGATTTAAAATCGG  |
| <i>CsHEC1-cuc-R</i>      | GCTCTGCAGGTCGACTCAAGGTTGGGATTGATGATG     |
| <i>CsOVATE-cLuc-F</i>    | TCCCGGGCGGTACCATGATGATGACACCAAACG        |
| <i>CsOVATE-cLuc-R</i>    | GCTCTGCAGGTCGACTCAGTTACAGAACAGAGACTG     |
| <i>CsHEC1-pGEX-4T-F</i>  | GGATCCCCGGAATTCATGGAAAATGATGATTTAAAATCGG |
| <i>CsHEC1-pGEX-4T-R</i>  | TCGACCCGGAATTCTCAAGGTTGGGATTGATGATG      |
| <i>CsOVATE-pET-28a-F</i> | CGCGGATCCGAATTCATGATGATGACACCAAACGAT     |
| <i>CsOVATE-pET-28a-R</i> | ACGGAGCTCGAATTCTCAGTTACAGAACAGAGACTGC    |
| <i>CsOVATE-CoIP-F</i>    | CGACTCTAGAAAGCTTATGATGATGACACCAAACG      |
| <i>CsOVATE-CoIP-R</i>    | TACCGGATCCACTAGTGTTACAGAACAGAGACTGC      |

---

**Primers for yeast one-hybrid, LUC activity measure assay**

---

|                     |                                                  |
|---------------------|--------------------------------------------------|
| <i>AtPID-Ebox-F</i> | AGCTTTCTCACGCGTTGTCTCACGCGTTGTCTCACGCGTTGG       |
| <i>AtPID-Ebox-R</i> | TCGACCAACGCGTGAGACAACGCGTGAGACAACGCGTGAGAA       |
| <i>CsYUC4-P1-F</i>  | AGCTTCAAGCATTTGAAAACAAGCATTTGAAAACAAGCATTTGAAAAG |
| <i>CsYUC4-P2-R</i>  | TCGACTTTTCAAATGCTTGTTTTCAAATGCTTGTTTTCAAATGCTTGA |
| <i>CsYUC4-P1-F</i>  | AGCTTAAGACAAATGACAAAAGACAAATGACAAAAGACAAATGACAAG |

|                         |                                                     |
|-------------------------|-----------------------------------------------------|
| <i>CsYUC4-P2-R</i>      | TCGACTTGTCAATTTGTCTTTTGTCAATTTGTCTTTTGTCAATTTGTCTTA |
| <i>CsHEC1-62SK-F</i>    | AGAACTAGTGGATCCATGGAAAATGATGATTTAAAATC              |
| <i>CsHEC1-62SK-R</i>    | GGTATCGATAAGCTTTCAAGGTTGGGATTGATG                   |
| <i>CsHEC2-62SK-F</i>    | AGAACTAGTGGATCCATGGACGATATCGACATC                   |
| <i>CsHEC2-62SK-R</i>    | GGTATCGATAAGCTTTCAAGACTGCATTTGCA                    |
| <i>CsOVATE-62SK-F</i>   | AGAACTAGTGGATCCATGATGATGACACCAAAACGA                |
| <i>CsOVATE-62SK-R</i>   | GGTATCGATAAGCTTTCAAGTTACAGAACAGAGACTGC              |
| <i>Csovate#1-62SK-R</i> | TCGACGGTATCGATAAGCTTCTAGTTCGTCGATTTTCATCGA          |
| <i>Csovate#2-62SK-R</i> | TCGACGGTATCGATAAGCTTTTATTTTGGTTTCTCCC               |
| <i>ProCsYUC4-0800F</i>  | TCGACGGTATCGATAAGCTTAGCAATGTTAATGCTGATGTC           |
| <i>ProCsYUC4-0800R</i>  | GCTCTAGAAGTGGATCCTAAAGTGAGTCTGTGTTTTGGT             |

---

**Primers for ChIP-PCR and EMSA**

---

|                           |                                                  |
|---------------------------|--------------------------------------------------|
| <i>CsHEC1-puc19flag-F</i> | CGGGGGACGAGCTCGGTACCATGGAAAATGATGATTTAAAATCGG    |
| <i>CsHEC1-puc19flag-R</i> | ATGGTCTTTGTAGTCTTCGAAAGGTTGGGATTGATGATGAT        |
| <i>CsHEC2-puc19flag-F</i> | CGGGGGACGAGCTCGGTACCATGGACGATATCGACATCCTCA       |
| <i>CsHEC2-puc19flag-R</i> | ATGGTCTTTGTAGTCTTCGAAAGACTGCATTTGCAAAGAAGC       |
| <i>Chip-CsYUC4-P1F</i>    | ACAGTTAAAGAGAAGGCGGGAATG                         |
| <i>Chip-CsYUC4-P1R</i>    | AGGAAAATAAGGAGAGTTAAATTGTTAATTCCT                |
| <i>Chip-CsYUC4-P2F</i>    | CGACTTGAATTTGGTTGATGAAC                          |
| <i>Chip-CsYUC4-P2R</i>    | GTTAATATGATTCACACACTCACGA                        |
| <i>Tubulin F</i>          | ACGCTGTTGGTGGTGGTAC                              |
| <i>Tubulin R</i>          | GAGAGGGGTAAACAGTGAATC                            |
| <i>YUC4-Biotin-P1F</i>    | Biotin-TGGAGCGTAACTTTCAAGCATTGAAAATGCGTGGGTGGA   |
| <i>YUC4-Biotin-P1R</i>    | Biotin-TCCACCCACGCATTTTCAAATGCTTGAAAAGTTACGCTCCA |
| <i>YUC4-cold-P1F</i>      | TGGAGCGTAACTTTCAAGCATTGAAAATGCGTGGGTGGA          |
| <i>YUC4-cold-P1R</i>      | TCCACCCACGCATTTTCAAATGCTTGAAAAGTTACGCTCCA        |
| <i>YUC4-mutBiotin-P1F</i> | Biotin-TGGAGCGTAACTTTCAAGAAAGGGAAAATGCGTGGGTGGA  |
| <i>YUC4-mutBiotin-P1R</i> | Biotin-TCCACCCACGCATTTTCCCTTTCTTGAAAAGTTACGCTCCA |

---

## SI References

1. Tamura K, Stecher G, Peterson D, Filipowski A, Kumar S, MEGA6: Molecular evolutionary genetics analysis version 6.0. *Mol. Biol. Evol.* **30**, 2725-2729 (2013).
2. Xing H. *et al.*, A CRISPR/Cas9 toolkit for multiplex genome editing in plants. *BMC Plant Biol.* **14**, 327 (2014).
3. Liu H. *et al.*, CRISPR-P 2.0: An improved CRISPR-Cas9 tool for genome editing in plants. *Mol. Plant* **10**, 530-532 (2017).
4. Hu B. *et al.*, Engineering non-transgenic gynocercious cucumber using an improved transformation protocol and optimized CRISPR/Cas9 system. *Mol Plant* **10**, 1575-1578 (2017).
5. Xin T. *et al.*, Targeted creating new mutants with compact plant architecture using CRISPR/Cas9 genome editing by an optimized genetic transformation procedure in cucurbit plants. *Hortic Res* **9**, (2022).
6. Wang Z. *et al.*, HECATE2 acts with GLABROUS3 and Tu to boost cytokinin biosynthesis and regulate cucumber fruit wart formation. *Plant Physiol.* **187**, 1619-1635 (2021).
7. Chen P. Y, Wang C. K, Soong S. C, To K. Y, Complete sequence of the binary vector pBI121 and its application in cloning T-DNA insertion from transgenic plants. *Mol. Breed.* **11**, 287-293 (2003).
8. Ni M. *et al.*, Strength and tissue specificity of chimeric promoters derived from the octopine and mannopine synthase genes. *Plant J.* **7**, 661-676 (1995).
9. Liu Z. *et al.*, Plasma membrane CRPK1-mediated phosphorylation of 14-3-3 proteins induces their nuclear import to fine-tune CBF signaling during cold response. *Mol. Cell* **66**, 117-128 (2017).
10. Zhang X. *et al.*, Transcription repressor HANABA TARANU controls flower development by integrating the actions of multiple hormones, floral organ specification genes, and GATA3 family genes in *Arabidopsis*. *Plant Cell* **25**, 83-101 (2013).
11. Gu R. *et al.*, Functional characterization of the promoter and second intron of *CUM1* during flower development in cucumber (*Cucumis sativus* L.). *Hortic Plant J.* **4**, 103-110 (2018).
12. Ohta M, Matsui K, Hiratsu K, Shinshi H, Ohme-Takagi M, Repression domains of class II ERF transcriptional repressors share an essential motif for active repression. *Plant Cell* **13**, 1959-1968 (2001).
13. Xu Y. *et al.*, A zinc finger protein BBX19 interacts with ABF3 to affect drought tolerance negatively in chrysanthemum. *Plant J.* **103**, 1783-1795 (2020).
14. Hellens R. P. *et al.*, Transient expression vectors for functional genomics, quantification of promoter activity and RNA silencing in plants. *Plant methods* **1**, 13 (2005).
15. Li X. *et al.*, Flagellin induces innate immunity in nonhost interactions that is suppressed by *Pseudomonas syringae* effectors. *Proc. Natl. Acad. Sci. U.S.A.* **102**, 12990-12995 (2005).
16. Gendrel A.-V, Lippman Z, Martienssen R, Colot V, Profiling histone modification patterns in plants using genomic tiling microarrays. *Nat. Methods* **2**, 213-218 (2005).
17. Ding L. *et al.*, HANABA TARANU (HAN) bridges meristem and organ primordia boundaries through PINHEAD, JAGGED, BLADE-ON-PETIOLE2 and CYTOKININ

- OXIDASE 3* during flower development in *Arabidopsis*. *PLoS Genet.* **11**, e1005479 (2015).
18. Wan H. *et al.*, Selection of appropriate reference genes for gene expression studies by quantitative real-time polymerase chain reaction in cucumber. *Anal. Biochem.* **399**, 257-261 (2010).
  19. Li B, Fields S, Identification of mutations in p53 that affect its binding to SV40 large T antigen by using the yeast two-hybrid system. *FASEB J.* **7**, 957-963 (1993).
  20. Iwabuchi K, Li B, Bartel P, Fields S, Use of the two-hybrid system to identify the domain of p53 involved in oligomerization. *Oncogene* **8**, 1693-1696 (1993).
  21. Zhou Z, Bi G, Zhou J, Luciferase complementation assay for protein-protein interactions in plants. *Curr. Protoc. Plant Biol.* **3**, 42-50 (2018).
  22. Wang Y. *et al.*, Mechanism of phytohormone involvement in feedback regulation of cotton leaf senescence induced by potassium deficiency. *J. Exp. Bot.* **63**, 5887-5901 (2012).
